# Supplementary material
Source: PubMed Central journal article supplement (PMC4047976)

| A | No. | Printed Glycan Structure                                                                                      | Structural Representation | RFU   |
|---|-----|---------------------------------------------------------------------------------------------------------------|---------------------------|-------|
|   | 1   | Neu5Ac $\alpha$ 2-3Gal $\beta$ 1-3(Fuc $\alpha$ 1-4)GlcNAc $\beta$ 1-3Gal $\beta$ 1-4(Fuc $\alpha$ 1-4)GlcNAc |                           | 1,750 |
|   | 2   | Neu5Ac $\alpha$ 2-3Gal $\beta$ 1-3(Fuc $\alpha$ 1-4)GlcNAc                                                    |                           | 1,250 |
|   | 3   | Neu5Ac $\alpha$ 2-3Gal $\beta$ 1-3(Fuc $\alpha$ 1-4)GlcNAc $\beta$ 1-3Gal $\beta$ 1-4(Fuc $\alpha$ 1-3)GlcNAc |                           | 80    |

| B | No. | Printed Glycan Structure                                                                 | Structural Representation | RFU    |
|---|-----|------------------------------------------------------------------------------------------|---------------------------|--------|
|   | 1   | Neu5Ac $\alpha$ 2-3Gal $\beta$ 1-3GlcNAc $\beta$ 1-3Gal $\beta$ 1-3Gal $\beta$ 1-4GlcNAc |                           | 13,400 |
|   | 2   | Neu5Ac $\alpha$ 2-3Gal $\beta$ 1-3GlcNAc $\beta$ 1-3GalNAc                               |                           | 1,476  |

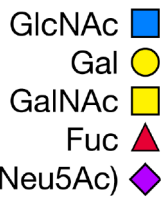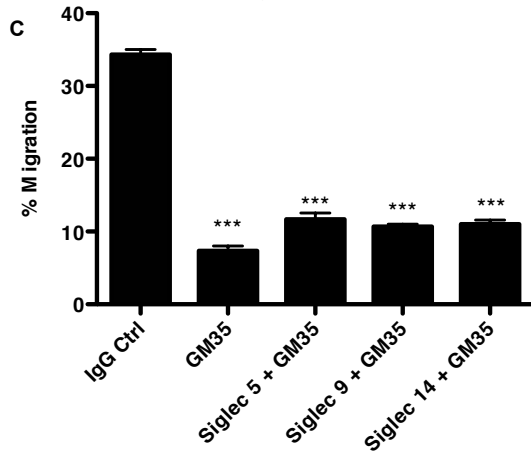

Supplement: NIHMS519073-supplement-2.pdf [file NIHMS519073-supplement-2.pdf]
