# Supplementary material
Source: PubMed Central journal article supplement (PMC4047976)

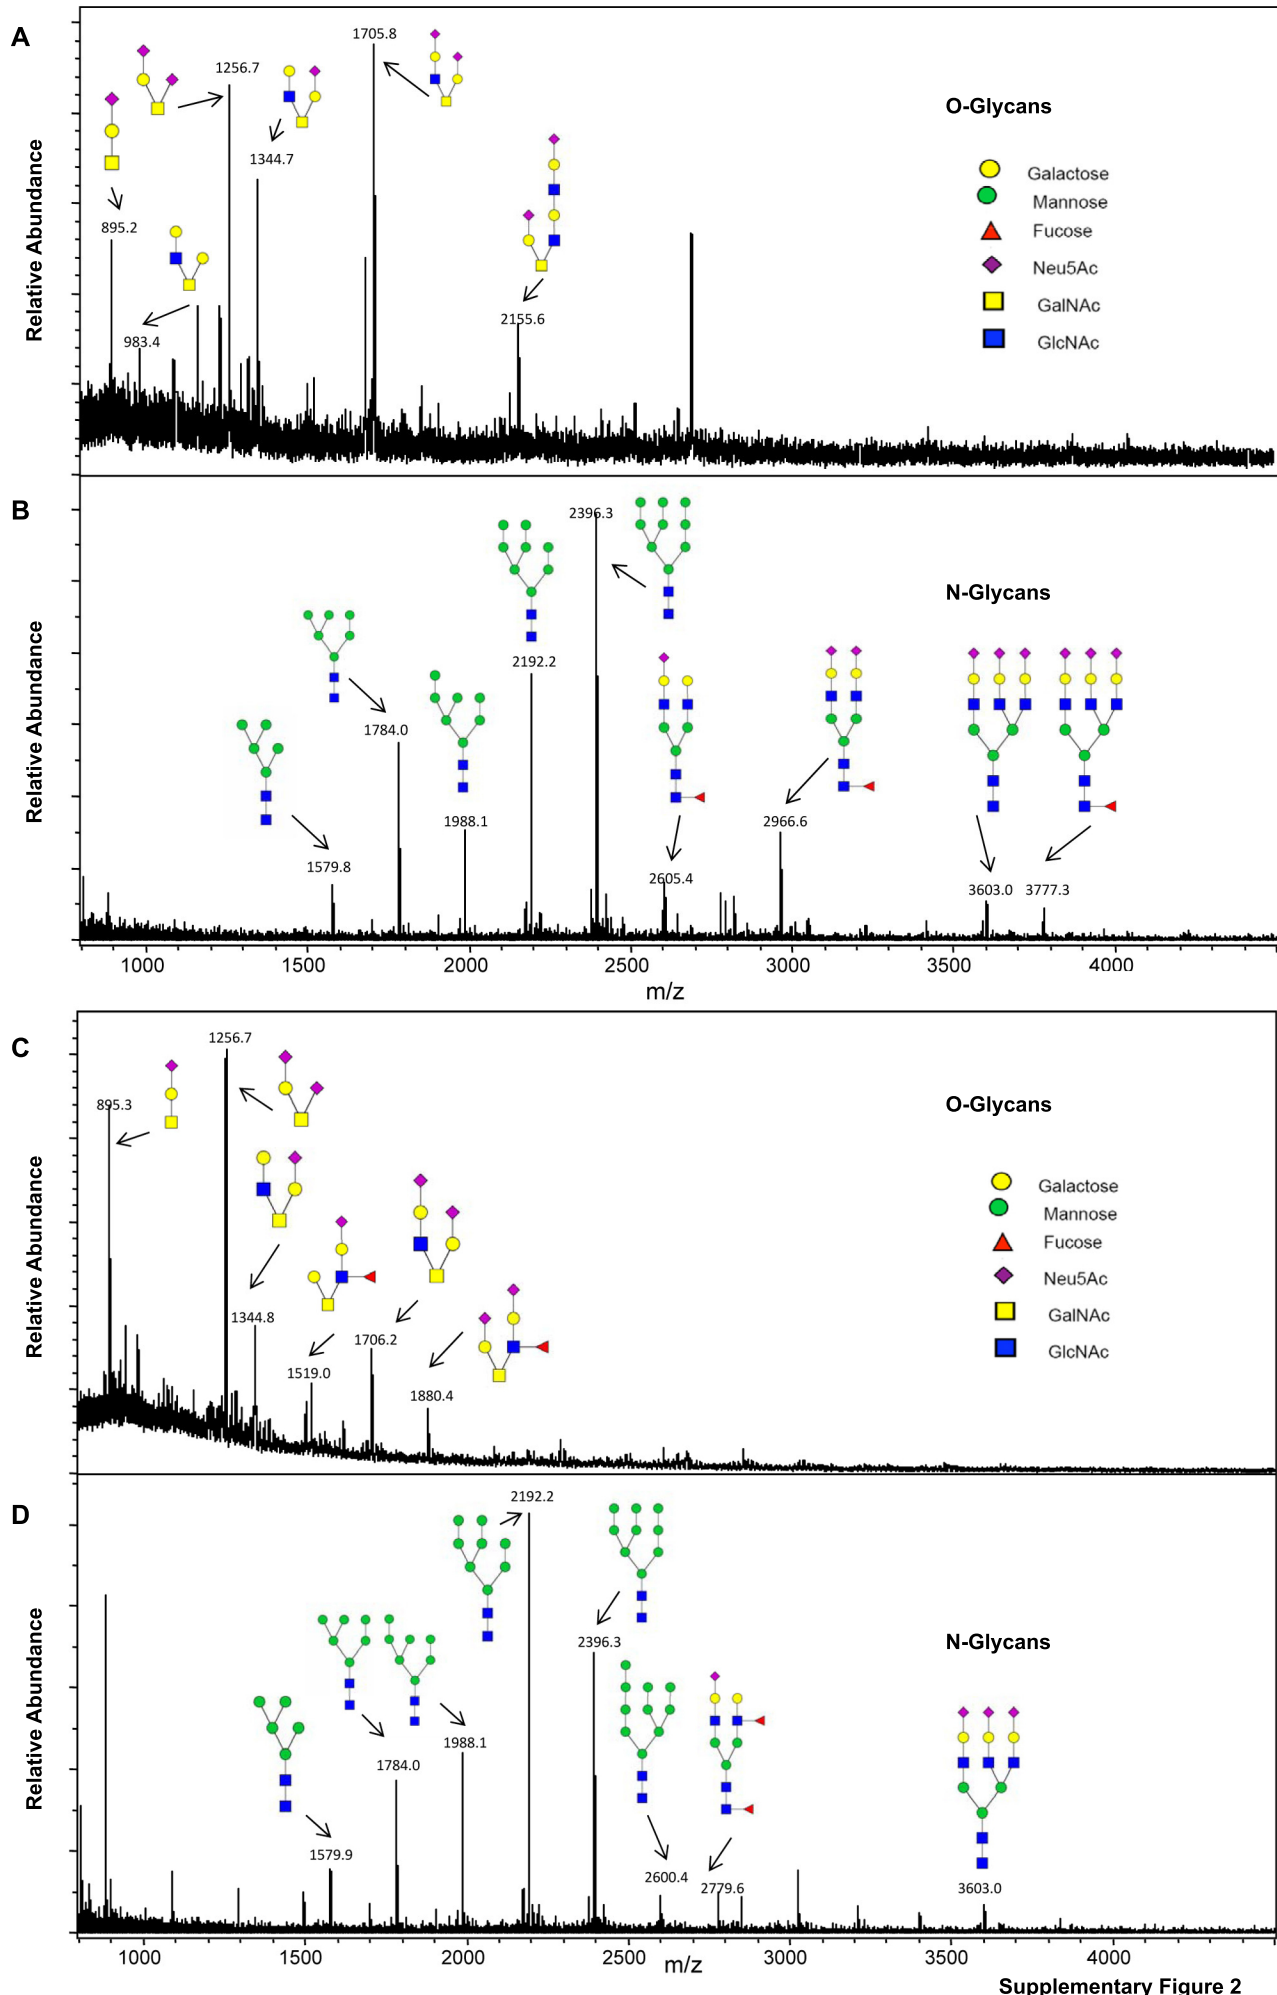

Supplementary Figure 2

Supplement: NIHMS519073-supplement-3.pdf [file NIHMS519073-supplement-3.pdf]

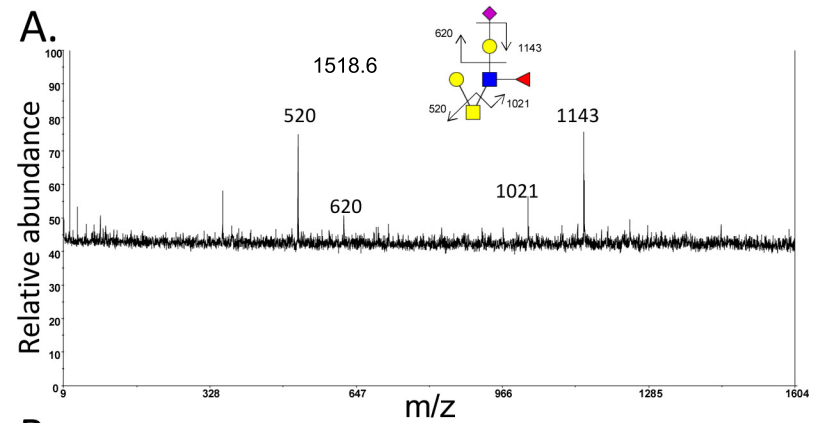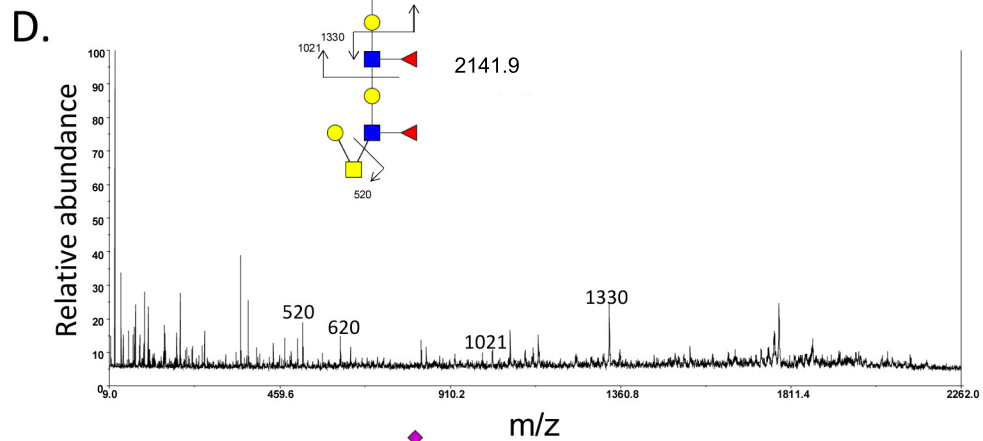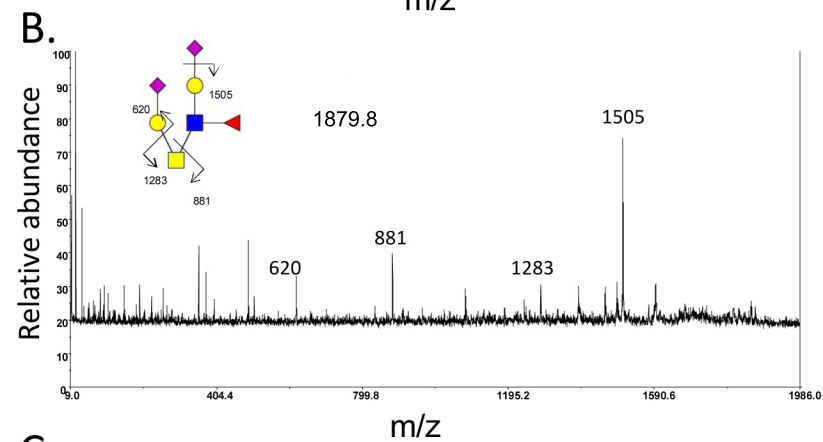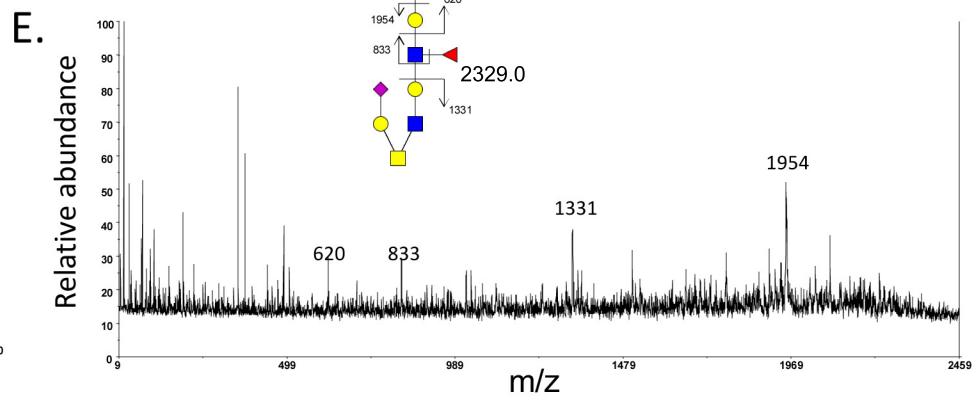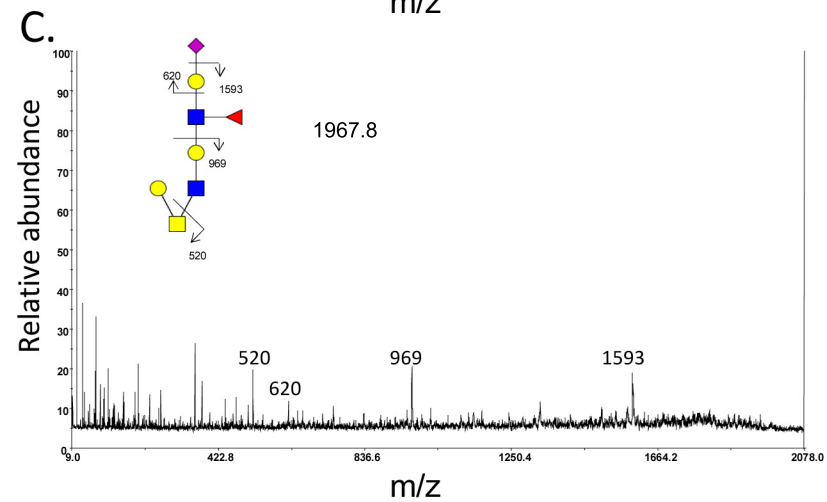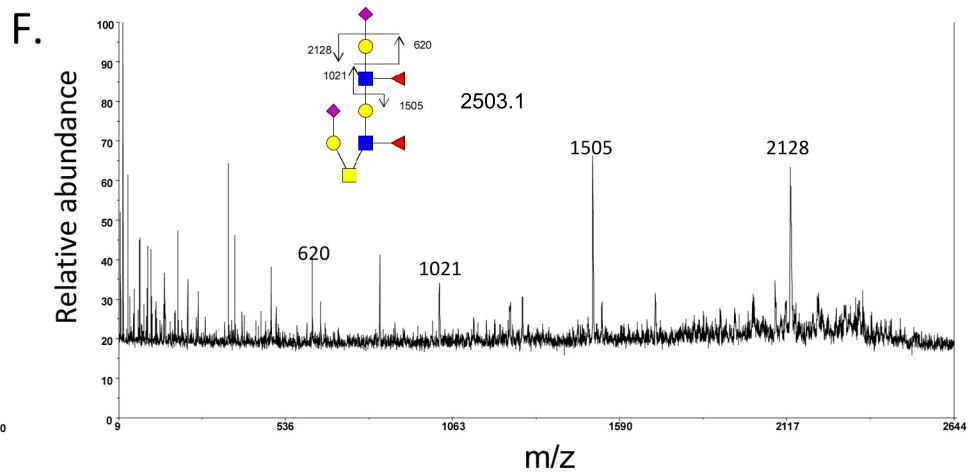

Supplement: NIHMS519073-supplement-4.pdf [file NIHMS519073-supplement-4.pdf]

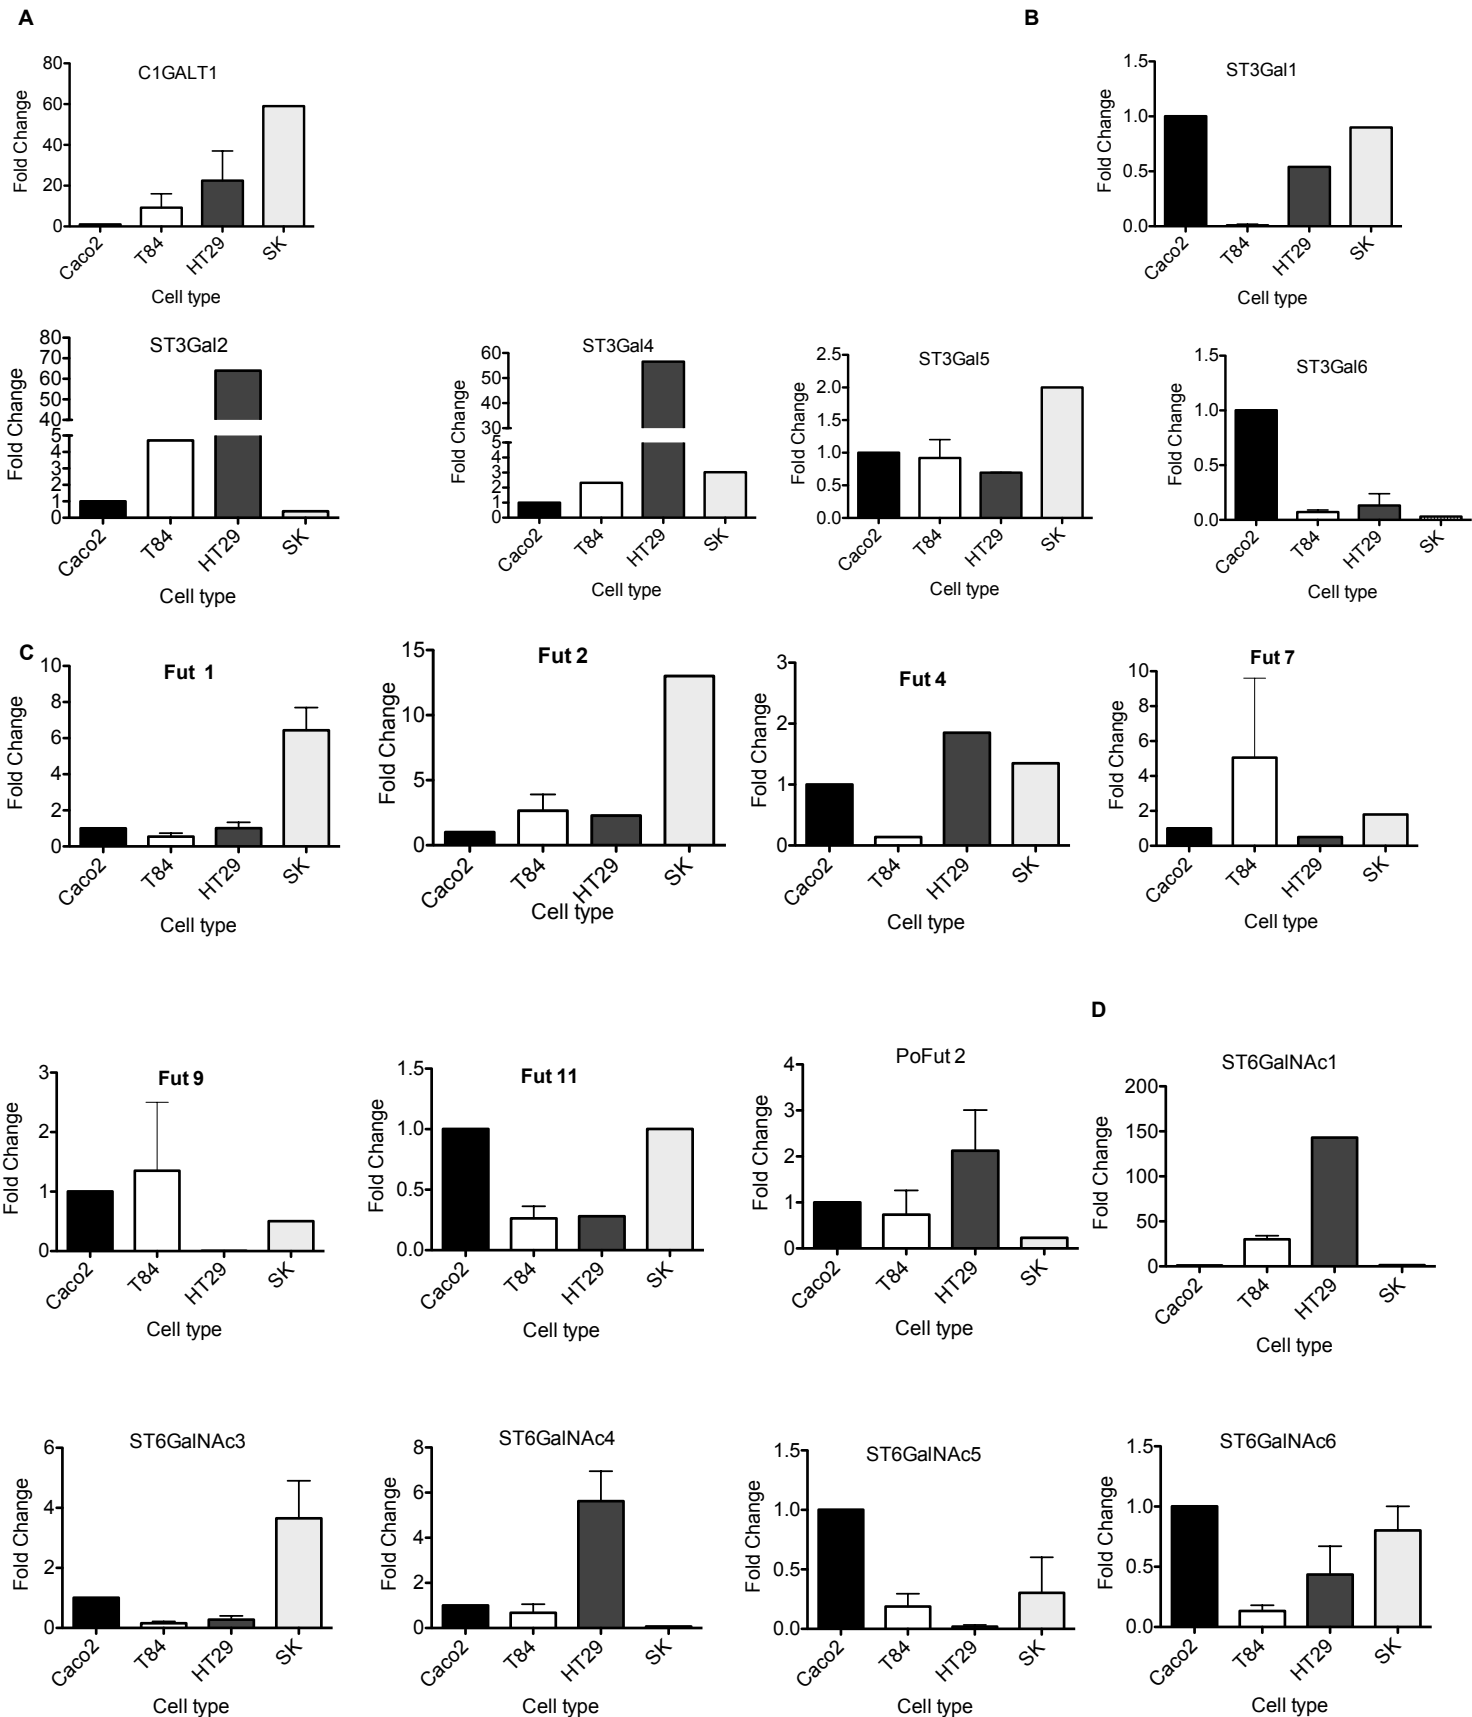

**Supplementary Figure 4**

Supplement: NIHMS519073-supplement-5.pdf [file NIHMS519073-supplement-5.pdf]
